# Supplementary material
Source: publisher figshare collection journal article supplement (https://acs.figshare.com/ndownloader/files/5157106)

# Platinum-Ruthenium Dinuclear Complex Bridged by Bis(terpyridyl)xanthene

*Rei Okamura, Tohru Wada, Katsuji Aikawa, Toshi Nagata, and Koji Tanaka\**

Institute for Molecular Science, and CREST, Japan Science and Technology Agency(JST),

Higashiyama 5-1, Myodaiji, Okazaki, Aichi 444-8787 Japan

## Supporting Information

1. X-ray structure of  $[2](PF_6)_2 \cdot 6CH_3CN$

## Supporting Information

### **X-ray Structure of [(PtCl)<sub>2</sub>(btpyxa)] (PF<sub>6</sub>)<sub>2</sub>·6CH<sub>3</sub>CN ([2](PF<sub>6</sub>)<sub>2</sub>·6CH<sub>3</sub>CN).**

Yellow crystals of [2](PF<sub>6</sub>)<sub>2</sub>·6CH<sub>3</sub>CN were obtained by vapor diffusion of diethyl ether into an acetonitrile solution of the complex. Crystal data of [2](PF<sub>6</sub>)<sub>2</sub>·6CH<sub>3</sub>CN are summarized in Table S1.

Data for [2](PF<sub>6</sub>)<sub>2</sub>·6CH<sub>3</sub>CN were collected on a Rigaku/MSM Mercury CCD diffractometer using graphite-monochromated Mo K $\alpha$  radiation ( $\lambda$  = 0.71070 Å) at 173 K, and processed using Crystal Clear.<sup>1</sup> The structure was solved by heavy-atom Patterson methods (Dirdif 94 Patty)<sup>2</sup> and refined by full-matrix least square refinement on F<sup>2</sup>. All non-hydrogen atoms except for C19 in terpyridyl moiety were refined anisotropically. All hydrogen atoms were located on the calculated positions and not refined. All calculations were performed using the teXsan crystallographic software package.<sup>3</sup>

### REFERENCE

- (1) Crystal Clear: Software Package, Rigaku and Molecular Structure Corporation, 1999.
- (2) PATTY: Beurskens, P.T., Admiraal, G., Beurskens, G., Bosman, W.P., de Gelder, R., Israel, R. and Smits, J.M.M.(1994). The DIRDIF-94 program system, Technical Report of the Crystallography Laboratory, University of Nijmegen, The Netherlands.
- (3) teXsan: Crystal Structure Analysis Package, Molecular Structure Corporation, 1985 & 1999.

**Table S1.** Crystallographic data for complex **[2](PF<sub>6</sub>)<sub>2</sub>·6CH<sub>3</sub>CN**

| <b>[2](PF<sub>6</sub>)<sub>2</sub>·6CH<sub>3</sub>CN</b> |                                                                                                                                     |
|----------------------------------------------------------|-------------------------------------------------------------------------------------------------------------------------------------|
| formula                                                  | C <sub>53</sub> H <sub>48</sub> Cl <sub>2</sub> F <sub>12</sub> N <sub>6</sub> OP <sub>2</sub> Pt <sub>2</sub> ·6CH <sub>3</sub> CN |
| formula weight                                           | 1782.33                                                                                                                             |
| color                                                    | yellow                                                                                                                              |
| crystal size/mm <sup>3</sup>                             | 0.40 × 0.30 × 0.10                                                                                                                  |
| crystal system                                           | triclinic                                                                                                                           |
| space group                                              | <i>P</i> -1                                                                                                                         |
| <i>a</i> /Å                                              | 13.841(7)                                                                                                                           |
| <i>b</i> /Å                                              | 14.377(7)                                                                                                                           |
| <i>c</i> /Å                                              | 19.442(10)                                                                                                                          |
| <i>α</i> /deg                                            | 95.226(7)                                                                                                                           |
| <i>β</i> /deg                                            | 100.167(5)                                                                                                                          |
| <i>γ</i> /deg                                            | 110.974(7)                                                                                                                          |
| <i>V</i> /Å <sup>3</sup>                                 | 3505(3)                                                                                                                             |
| <i>Z</i>                                                 | 2                                                                                                                                   |
| <i>T</i> /K                                              | -173                                                                                                                                |
| <i>D</i> <sub>calc</sub> /g cm <sup>-3</sup>             | 1.689                                                                                                                               |
| radiation                                                | MoKα (λ = 0.71070)                                                                                                                  |
| μ/cm <sup>-1</sup>                                       | 41.75                                                                                                                               |
| <i>F</i> (000)                                           | 1752.00                                                                                                                             |
| 2θ <sub>max</sub> /deg                                   | 55.0                                                                                                                                |
| no. of reflections (all, 2θ < 54.97°)                    | 15186                                                                                                                               |
| no. of variables                                         | 860                                                                                                                                 |
| reflection/parameter ratio                               | 17.66                                                                                                                               |
| GOF                                                      | 1.52                                                                                                                                |
| R1 <sup>a</sup> [ <i>I</i> > 2σ( <i>I</i> )]             | 0.065                                                                                                                               |
| <i>R</i> <sup>b</sup> (all data)                         | 0.112                                                                                                                               |
| <i>R</i> <sub>w</sub> <sup>c</sup> (all data)            | 0.155                                                                                                                               |

<sup>a</sup> R1 = Σ||F<sub>o</sub><sup>2</sup>|-|F<sub>c</sub><sup>2</sup>||/Σ|F<sub>o</sub><sup>2</sup>|. <sup>b</sup> *R* = Σ(F<sub>o</sub><sup>2</sup>-F<sub>c</sub><sup>2</sup>)/ΣF<sub>o</sub><sup>2</sup>. <sup>c</sup> *R*<sub>w</sub> = [(Σw(F<sub>o</sub><sup>2</sup>-F<sub>c</sub><sup>2</sup>)<sup>2</sup>/Σw(F<sub>o</sub><sup>2</sup>)<sup>2</sup>)]<sup>1/2</sup>.

**Table 2.** Selected Bond Lengths (Å) and Bond Angles (deg) of [2](PF<sub>6</sub>)<sub>2</sub>·6CH<sub>3</sub>CN\*

|                |          |               |          |
|----------------|----------|---------------|----------|
| Pt1 – Cl1      | 2.298(2) | Pt1 – N1      | 2.017(6) |
| Pt1 – N2       | 1.949(6) | Pt1 – N3      | 2.021(7) |
| Pt2 – Cl2      | 2.297(2) | Pt2 – N4      | 2.019(6) |
| Pt2 – N5       | 1.942(6) | Pt2 – N6      | 2.026(7) |
| <hr/>          |          |               |          |
| Cl1 – Pt1 – N1 | 98.8(2)  | N1 – Pt1 – N2 | 80.9(3)  |
| Cl1 – Pt1 – N3 | 99.3(2)  | N2 – Pt1 – N3 | 81.0(3)  |
| Cl2 – Pt2 – N4 | 99.5(2)  | N4 – Pt2 – N5 | 80.8(2)  |
| Cl2 – Pt2 – N6 | 98.8(2)  | N5 – Pt2 – N6 | 80.9(2)  |

\*Intramolecular distance: Pt1...Pt2, 4.38 Å. Intermolecular distance: Pt1...Pt1, 4.20 Å, Pt2...Pt2, 4.39 Å.

**Figure S1.** ORTEP drawing of the cationic part of [2](PF<sub>6</sub>)<sub>2</sub>·6CH<sub>3</sub>CN with 50% thermal ellipsoids except for C19 atom. Hydrogen atoms are omitted for clarify.

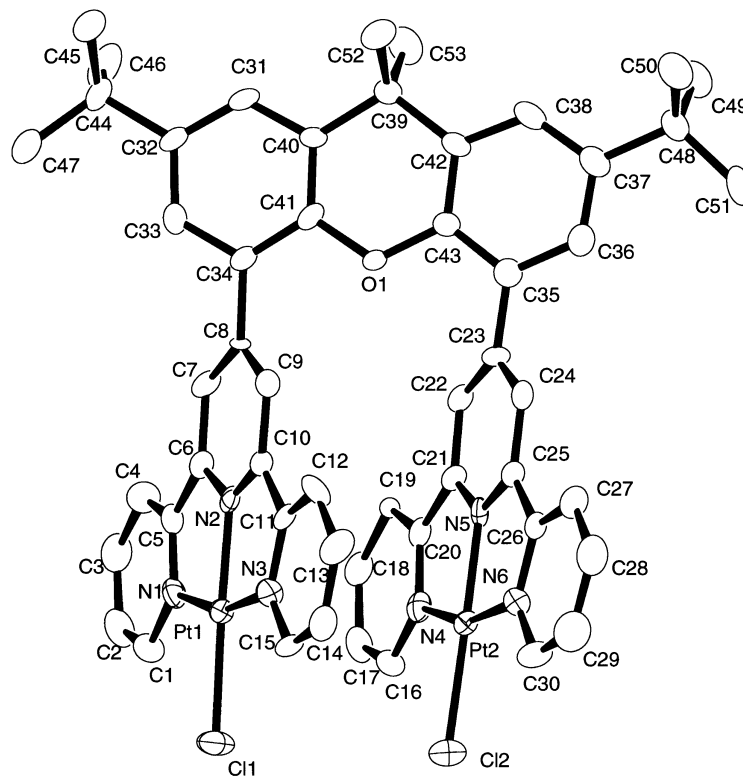

**Figure S2.** Crystal packing of [2](PF<sub>6</sub>)<sub>2</sub>·6CH<sub>3</sub>CN. The PF<sub>6</sub><sup>−</sup> ions and CH<sub>3</sub>CN molecules are omitted for clarify.

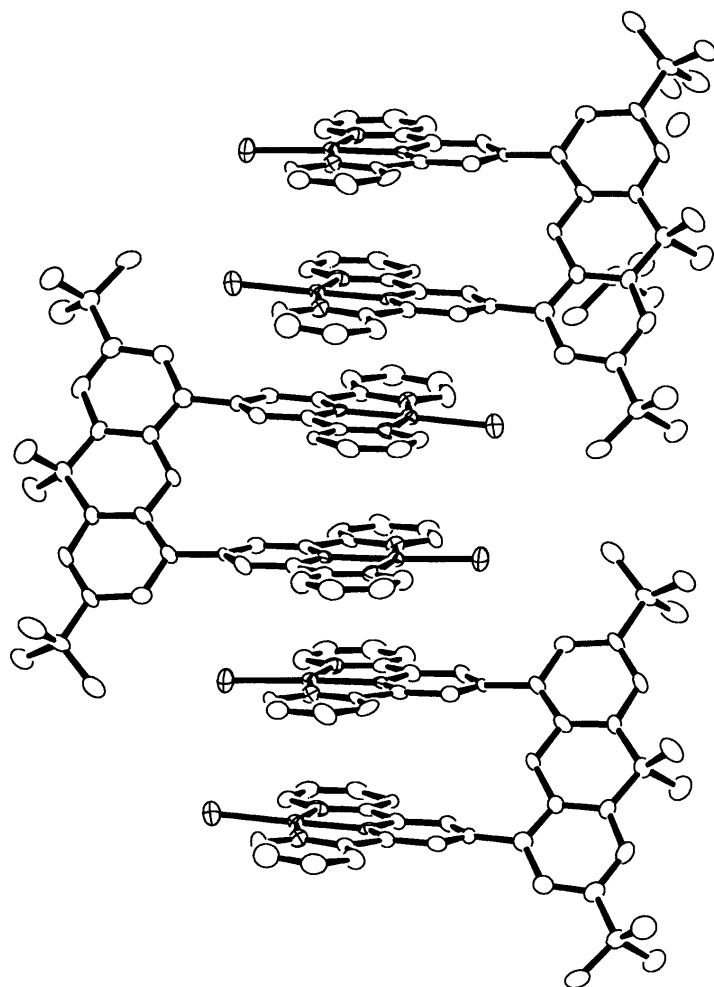

Supplement: Supplementary file 1 [file 5157106]
